# Supplementary material for: Early Eocene vigorous ocean overturning and its contribution to a warm Southern Ocean
Source: Copernicus journal article supplement (doi:10.5194/cp-2019-163), 2020-01-16
Supplement: Supplementary file [file cp-2019-163-AC1-supplement.pdf]

## Authors' response to Dan Lunt (Referee #1)

### Interactive comment on “Early Eocene vigorous ocean overturning and its contribution to a warm Southern Ocean” by Yurui Zhang et al.

Dan Lunt (Referee)

I reviewed this paper for another journal. The CP editor informed me that this paper is unchanged from that version, so I am attaching here my original review (as such the line numbers refer to the previous version).

Please also note the supplement to this comment:<https://www.clim-past-discuss.net/cp-2019-163/cp-2019-163-RC1-supplement.pdf>

We are grateful to the reviewer for his insightful comments. We apologize about it but there has been some miscommunication between the editor, the reviewers and ourselves. Indeed, the submitted version of the paper to *Climate of the Past* was modified from the version the reviewer has previously reviewed, and most comments and suggestions were taken into account. Below we provide answers to the questions raised by the reviewer, i.e. we explained how and where these have been incorporated in the manuscript and clarified some points (we denoted the replies by blue color). The line numbers (in brackets) correspond to this revised version of the paper. These modified places are also marked by color in the annotated copy of manuscript.

In this paper, Zhang et al present results from IPSL-CM5A2 configured for the Eocene, and compare them with results of the modern. The focus is on ocean circulation, including regions of deep water formation, and the partitioning of heat transports into separate terms. Finally, sensitivity results to modified CO<sub>2</sub> are presented. The paper is very well written and clear in general, and in my opinion it is very appropriate for *Climate Dynamics*, with minor-moderate revisions.

#### General Comments

Line 100-127. The model description and experimental design needs considerably more detail. Given that Sepulchre et al is just “in prep”, we need many more details of the difference between IPSL-CM5A2 and IPSL-CM5A. For the experimental design, we need to know how soils, vegetation, sub-grid scale topography, and what frame of reference was used for the Herold reconstruction. The “bar” here is that the simulations should be approximately repeatable. The Lunt et al experimental design paper gives several options for many of the boundary conditions, so we need to know what choices have been made here.

This is a fair critic. First of all, since the initial submission, the paper by Sepulchre et al is now under review, and the preprint version is available from <https://www.geosci-model-dev-discuss.net/gmd-2019-332/>

Hence, we do not want to repeat too much of the material presented there. However, we have expanded largely the description of the model and of the different simulations, as our section 2.1 has been fully re-written. [line 90-166]

The model-data comparison needs some more work. In particular, the annual mean SSTs should be compared with the data in the main paper, and the seasonal in Supp Info, rather than the other way round.

We have moved the annual mean SST in the main text (Fig. 2A) and the summer SST in Supplementary information (Fig. S2A)

More explanation is needed of what the “uncertainty” in the proxies (Table 2) represents.

In response to this comment, we have added the uncertainty in the caption of Table 2, which is defined as follows: “The uncertainty range is defined as the  $2\sigma$  deviations (2.2% and 97.8%) for  $\delta^{18}\text{O}$ , and as the range between 5% and 95% percentile SST estimates for  $\text{TEX}^{86}$ , Mg/Ca and clumped isotope data.”

Also, it is claimed that the model-data agreement is “overall consistent”, but this should be quantified more. For example, what RMS score would be obtained if it was assumed that the Eocene warmed uniformly, or with a  $\cos(\text{latitude})$  response. This can give some quantification to the question “how good is good”. Also, the choice of  $3x \text{CO}_2$  is rather arbitrary in the context of model-data comparison, so the GCM warming patterns could be scaled uniformly to best fit the data, and the RMS recalculated.

We are now presenting a more quantitative evaluation. First, we have justified better the fact that we mostly focus on the 55Ma-3x simulation, given that the agreement with the proxy-based SST reconstruction is better for this simulation than the other one (55Ma-1.5x simulation; see Table 2). Then, we have mostly followed the methodology proposed by Kennedy-Asser et al. (2019), that suggest 2 benchmarks to conduct such an evaluation. Benchmark 1 assumes a uniform mean temperature, and benchmark 2 is based on the assumption of the least squares linear fit through the proxy-based SST estimates with the cosine function of paleo-latitude from each-type-of-proxy sites. The results show the performance of the model simulation both RMSD metrics outperforms benchmark 1, but not benchmark 2 for some proxies. This means that the simulation outperforms the constant mean benchmark but not fully the latitudinal gradient benchmark, and thus it corresponds to the ‘moderate good performance’ following the wording used by Kennedy-Asser et al. (2019).

This is included in the text (lines 182-189), and Table 2, and in supplement materials (Lines 2-40, table S1 and figure 2B).

### **Specific Comments**

Abstract - please mention the results of the  $\text{CO}_2$  sensitivity here. Otherwise “different levels of atmospheric  $\text{CO}_2$ ” on line 16 is hard to understand when reading for the first time.

The sentence ‘Simulations with different atmospheric  $\text{CO}_2$  levels show that the ocean circulation and heat transport are relatively insensitive to  $\text{CO}_2$ -doubling’ has been added at the end of the abstract. [line 17-18]

Abstract – please add something about the model-data comparison that you have carried out.

We have added the sentence of “When compared with proxy-based reconstructions, the simulations reasonably capture both the reconstructed amplitude and pattern of early Eocene sea surface temperature.” in the abstract. [line 4-5]

Line 19: Explain where (depth and latitude) that the 40Sv occurs.

The 40Sv MOC occurs at latitude of 60°S, as mentioned in the text. [line 8]

Line 32: Check whether 55 Ma is really the time period that DeepMIP focuses on; see e.g. Hollis et al (2019) and Lunt et al (2017).

We have modified this to 55Ma-50Ma, referring to the early-Eocene climate optimum (EECO) of DeepMIP framework, and added a sentence to clarify this. [Line 21, lines 24-26]

Line 40: I don't think it's correct that CO<sub>2</sub> can't explain the decreased meridional gradient at the EECO. The high CO<sub>2</sub> can lead to enhanced feedbacks at high latitudes.

The sentence has been changed to: ‘In the early Eocene, high levels of CO<sub>2</sub> in the atmosphere are undoubtedly a critical contributor to the extremely warm climate, but they do not fully explain the extreme warmth at high-latitudes and the reduced equator-to-pole temperature gradient.’ [line 29-32]

Figure S11: For the time series of temperature in the simulations, the evolution seems inconsistent with the statement that the 1.5x run is branched off from the 3x run after 1500 years. Please align the simulations correctly so that the 1.5x run starts after 1500 years.

The figure has been modified, as indeed, “the 1.5x run is branched off from the 3x run after 1500 years”.

As well as the time series of temperature (Figure S11), it is important to show the time series of some metric of overturning, e.g. maximum overturning, or averaged mixed-layer depth, so we can assess to what extent the ocean circulation is in equilibrium, and the inter-annual variability of circulation.

We have included in Figure S1 the time series of MOC and temperature (both the SST and volume averaged temperature).

Figure 4: maybe use a log scale rather than using different scales for each panel, or use the same scale for each panel.

We had tried the log scale and the same scale for all panels by following this comment, but the figure becomes messy. We would like to keep it as it is to improve readability.

Line 223: Not clear what “intermittent” means here – it implies temporal variability.

We mean deepwater is formed during some winters. The sentence has been modified to improve clarity. [Line 255]

Line 234: I would have expected the vertical gradient in density, rather than surface density, to be the key control.

The density at depth does not change much, meaning that the change in vertical density gradient is largely determined by the surface density, which can be seen as a proxy. The text has been modified to explain this better. [line 263-265]

Line 237: For the salinity and temperature values, please also give the percentage change that this induces in density (e.g. 80% and 20%)

Change in salinity induces a density change of  $0.57 \text{ kg/m}^3$  that is partly balanced by temperature-induced change of  $0.06 \text{ kg/m}^3$ . This is clarified in the text. [lines 266-268]

Line 243-254: I am not totally convinced by this mechanistic link to atmospheric circulation. Please either add some more quantitative analysis, or caveat this section with “possible” or “maybe”.

This section has been fully revised to take into account this comment. [lines 274-285]

Line 294: This additional simulation should be introduced in the methods section.

This additional simulation (55Ma-3x-noM2) is now presented in the method section. [line 157-158]

Line 335-336: Please reference/add a Figure for “visible on sea surface salinity”

Sea surface salinity is partly decided by the freshwater budget (P-E+R) (Table 3) with the atmosphere. This budget is largely affected by the precipitation (Fig S3) when other processes are similar. So we showed the driver of sea surface salinity, precipitation, as an indicator, and added references on this. [lines 366]

Line 356-366: This section may link more clearly to ocean circulation if you explore the wind stress curl rather than the wind stress.

We had calculated the wind stress curl, which however is not as clear as the wind stress. So we would like to keep the wind stress for clarity. [lines 385-394]

Line 498-499: This non-linearity in climate sensitivity is interesting and could be explored in a bit more detail. See e.g. discussion of why this may be in Farnsworth et al, in press, GRL.

The larger temperature response of the 55Ma simulation to  $\text{CO}_2$  doubling is consistent with the results of Farnsworth et al. (2019), that we now reference explicitly in the text. [lines 519-520]

Line 552: It is not clear what you mean by “robust”.

We meant that the response is stable. Robust has been changed to stable. [line 565]

Line 560-570: Make clearer at the outset of this paragraph that it is a summary of the previous paradigm, not a summary of your results.

We have added “Numerous proxy based reconstructions have revealed that” in the first sentence to clarify the summary of previous studies, on which we started from. [lines 564-565]

## Technical Comments

Line 37: “Ma ago” should be “Ma”.

Fixed. [line 28]

Line 44: “continental configuration” as well as “bathymetry”

Done [line 34]

Line 68: “latitude” should be “latitudes”

Done [line 56]

Line 82: remove “briefly”

Done [line 6-69]

Line 89: remove “IPSL in the following” and stick with the full name.

Done [line 75]

Equation 1: need to define E, W, x, z.

Done

Line 172: “clockwise” needs definition of which way we are “facing”.

The meridional transport was integrated from the west to east across the basin, implying we are facing the west. [line 208-209]

Line 221: “deep convection” instead of “convection”.

Done [line 253]

Line 242: net surface freshwater gain.

Fixed. [line 274]

Line 447: label the two terms in the equation, e.g. with curly brackets, OHT<sub>moc</sub> and OHT<sub>gyre</sub>.

We have labeled these two terms in the revised version. [line 471]

Line 530: HadCM3L.

Done [line 537]

Line 560: Warmest period in the Cenozoic.

Done [line 564-565]

Figure 2: Add labels for different lines.

Done

Figure 3: Add units for isopycnal contours in caption.

Done
